# Supplementary material
Source: PubMed Central journal article supplement (PMC8853900)
Supplement: 40520_2022_2092_MOESM2_ESM.pdf [file 40520_2022_2092_MOESM2_ESM.pdf]

Supplementary Table

| <b>Supplementary Table S1. MoCA's mean subscores according to participants' group</b> |                                 |                                           |                                         |
|---------------------------------------------------------------------------------------|---------------------------------|-------------------------------------------|-----------------------------------------|
|                                                                                       | <b>Total sample<br/>n = 227</b> | <b>Healthy<br/>participants<br/>n=126</b> | <b>Cardiovascular<br/>disease n=101</b> |
| <b>Subscores</b>                                                                      |                                 |                                           |                                         |
| Visuoexecutive M ± SD                                                                 | 4.2 ± 0.9                       | 4.2 ± 0.8                                 | 4.2 ± 1.0                               |
| Naming M ± SD                                                                         | 2.9 ± .5                        | 2.9 ± 0.4                                 | 2.9 ± 0.5                               |
| Attention M ± SD                                                                      | 5.7 ± 0.7                       | 5.7 ± 0.7                                 | 5.7 ± 0.6                               |
| Langage M ± SD                                                                        | 2.5 ± 0.6                       | 2.6 ± 0.6                                 | 2.4 ± 0.7                               |
| Abstraction M ± SD                                                                    | 1.7 ± 0.5                       | 1.8 ± 0.4                                 | 1.7 ± 0.6                               |
| Memory M ± SD                                                                         | 4.1 ± 1.1                       | 4.2 ± 1.0                                 | 4.0 ± 1.2                               |
| Orientation M ± SD                                                                    | 5.9 ± 0.3                       | 5.9 ± 0.3                                 | 6.0 ± 0.2                               |
| Abbreviations: M, mean; MoCA, Montreal Cognitive Assessment; SD, standard deviation.  |                                 |                                           |                                         |
